# Supplementary material for: Exploiting nanoscale effects enables ultra-low temperature to produce porous silicon
Source: Royal Society of Chemistry journal article supplement (doi:10.1039/d1ra07212a), 2021-01-01
Supplement: d1ra07212a1.pdf [file d1ra07212a1.pdf]

## Electronic Supplementary Information

# Exploiting nanoscale effects enables ultra-low temperature to produce porous silicon

Maximilian Yan and Siddharth V. Patwardhan\*

Department of Chemical and Biological Engineering, Green Nanomaterials Research Group,  
The University of Sheffield, Mappin Street, Sheffield S1 3JD, UK.

\*s.patwardhan@sheffield.ac.uk

Table S1: Concentration of NH<sub>3</sub> used in Stöber silica synthesis and the resulting silica particle sizes measured by TEM.

| [NH <sub>3</sub> ]<br>(M) | Particle diameter (nm) | Internal specific surface area (m <sup>2</sup> /g) |
|---------------------------|------------------------|----------------------------------------------------|
| 0.01                      | 20 ± 2                 | 45                                                 |
| 0.05                      | 75 ± 8                 | 9                                                  |
| 1.13                      | 500 ± 17               | 6                                                  |

Table S2: Properties of silica and their reduction products at different temperatures are summarised.

| Sample     | Silicon Yield (mol%) | Specific surface area (m <sup>2</sup> /g) <sup>a</sup> | Total pore volume (cm <sup>3</sup> /g) |
|------------|----------------------|--------------------------------------------------------|----------------------------------------|
| S20        | n/a *                | 189                                                    | 0.79                                   |
| S500       | n/a *                | 7                                                      | 0.01                                   |
| S20 450°C  | 35                   | 184                                                    | 0.24                                   |
| S20 650°C  | 56                   | 92                                                     | 0.19                                   |
| S500 650°C | 50                   | 179                                                    | 0.29                                   |
| F7         | n/a *                | 424                                                    | 0.7                                    |
| F7 380°C   | 58                   | 70                                                     | 0.16                                   |
| F7 450°C   | 31                   | 177                                                    | 0.47                                   |

<sup>a</sup> This is total surface area (internal and external).

\* This is the feedstock silica samples which has not undergone reduction and hence a yield of silicon is not applicable.

Table S3: Crystal planes identified in Figure S4 and associated d-spacings, 2θ angles and miller indices.

| d-spacing (nm) | 2θ (degrees) | Miller Indices |
|----------------|--------------|----------------|
| 0.32           | 28           | (111)          |
| 0.20           | 48           | (220)          |
| 0.17           | 56           | (311)          |
| 0.14           | 76           | (331)          |

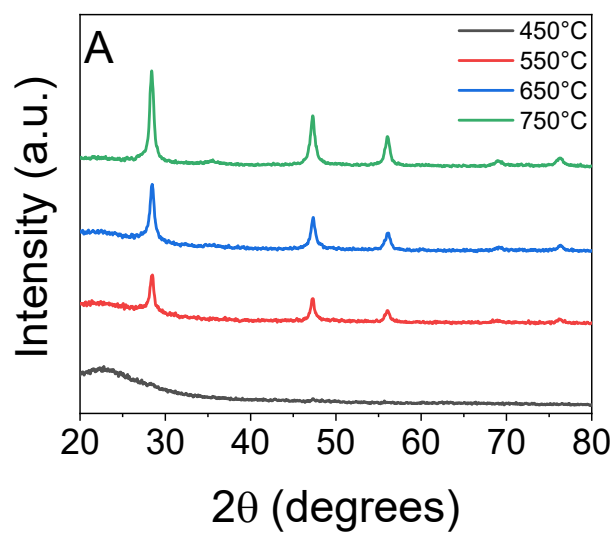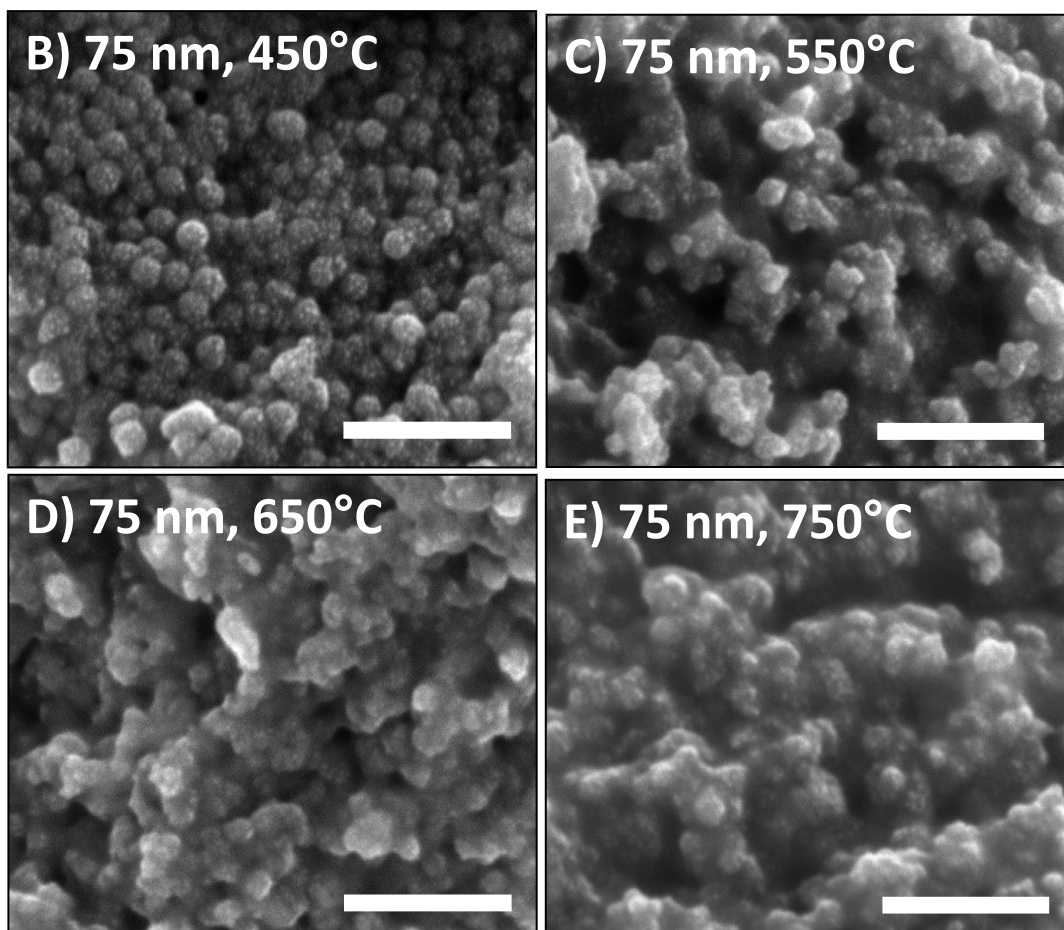

Figure S1: (A) XRD and (B-E) SEM images of 75 nm particles (S75) reduced at different temperatures. Scale bars of SEM images are 500 nm. All data was collected on samples after HCl etching.

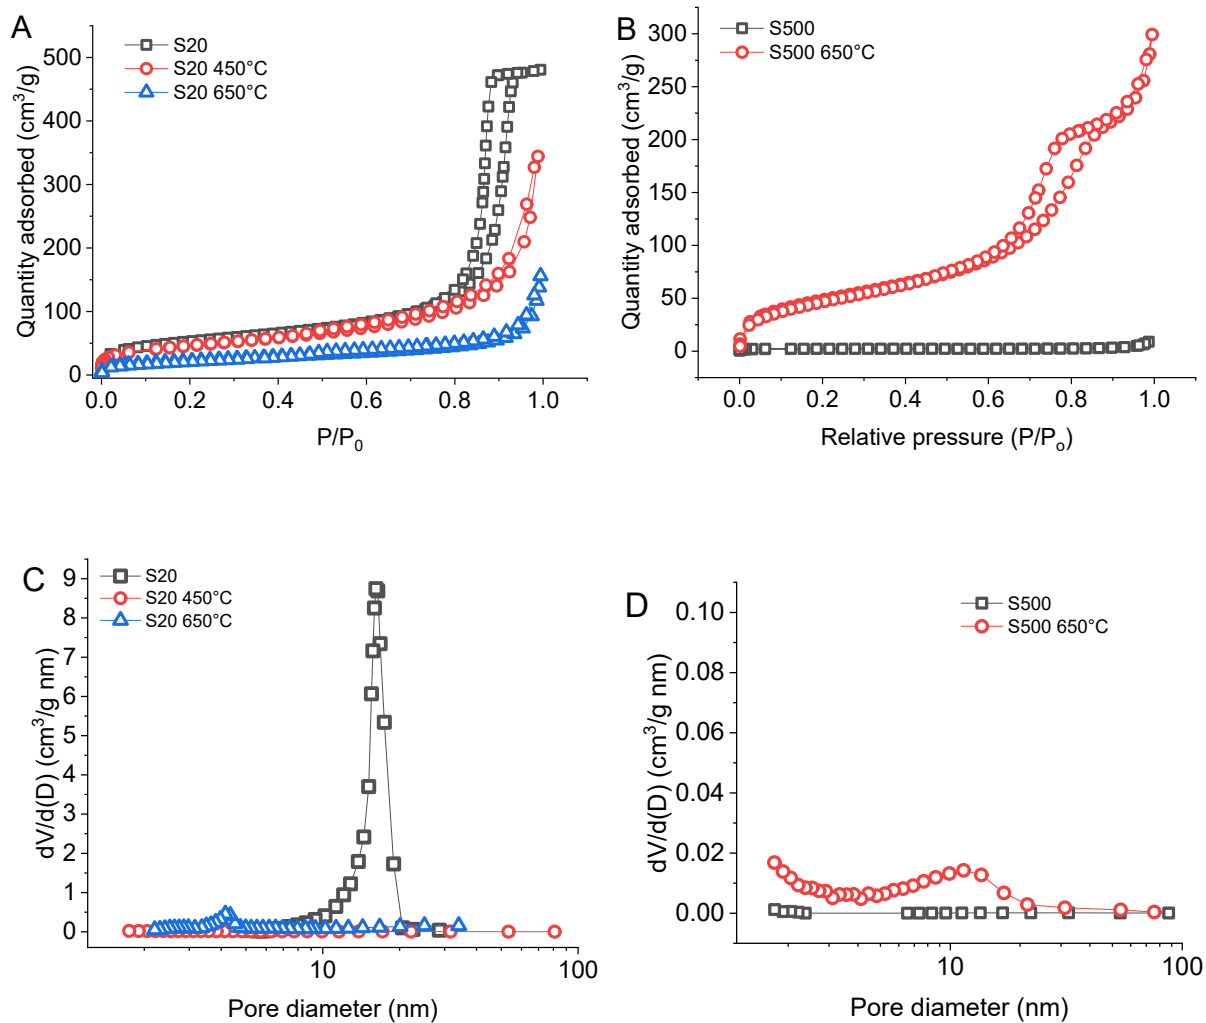

Figure S2: The isotherms for pristine and reduced A) S20 particles\* and B) S500 particles are given. C) The BJH desorption pore sizes are shown for C) S20 and D) S500 samples, both reduced and unreduced samples. \*While S20 does not have any internal surface area, the data in parts (A) and (C) include external surface area.

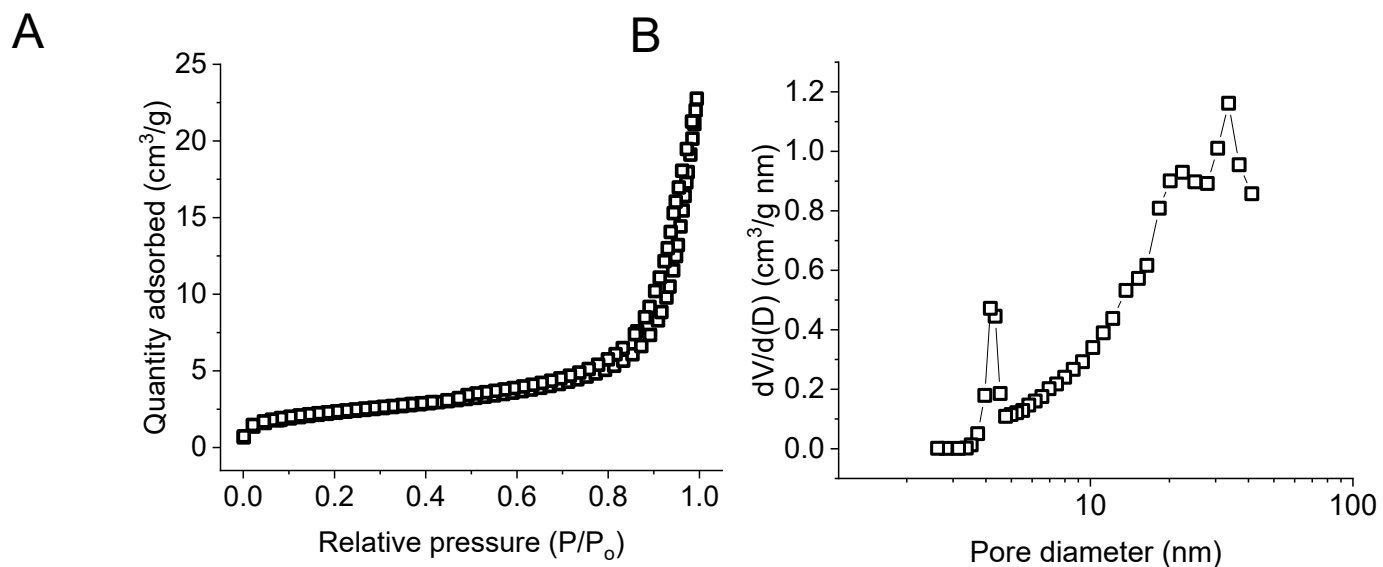

Figure S3: A) Gas adsorption isotherm and B) pore size distribution of 75 nm particles (S75) reduced at 650°C.

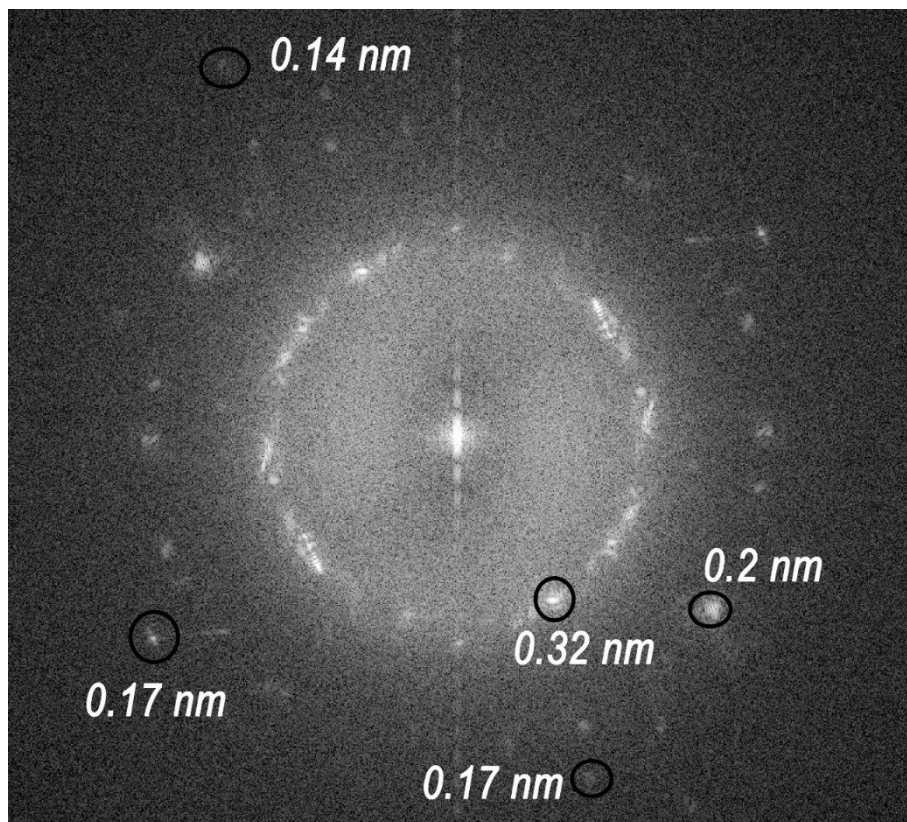

Fig. S4: FFT analysis of the TEM image shown in Figure 3B. d-spacings for all identified crystal planes are shown on the image and associated parameters are listed in Table S3.

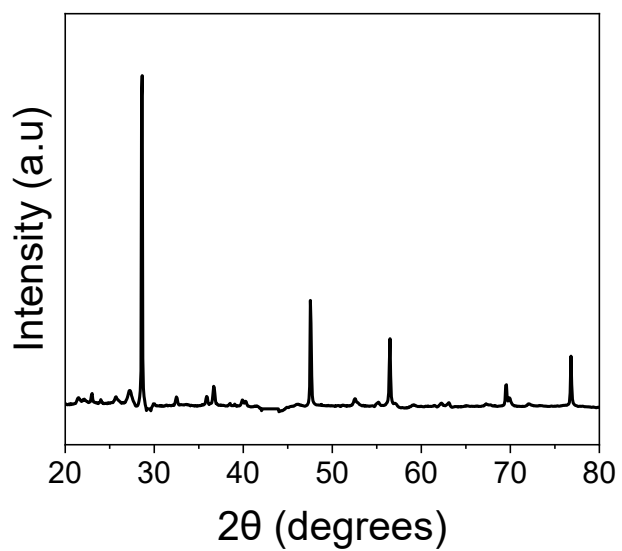

Fig. S5: XRD of the reduction of F7 at 380°C after washing in HCl.
